# Supplementary material for: One-pot synthesis of noble metal nanoparticles with a core–shell construction
Source: Royal Society of Chemistry journal article supplement (doi:10.1039/c4ce02560a), 2015-01-01
Supplement: c4ce02560a1.pdf [file c4ce02560a1.pdf]

## Electronic Supplementary Information

### **One-pot synthesis of noble metal nanoparticles with a core–shell construction**

Pengfei Hou,<sup>1,2</sup> Hui Liu,<sup>1</sup> Jianling Li<sup>2,\*</sup> and Jun Yang<sup>1,\*</sup>

<sup>1</sup> State Key Laboratory of Multiphase Complex Systems, Institute of Process Engineering, Chinese Academy of Sciences, Beijing 100190, China. Fax: 86-10-8254 4915; Tel: 86-10-8254 4915; E-mail: [jyang@ipe.ac.cn](mailto:jyang@ipe.ac.cn)

<sup>2</sup> State Key Laboratory of Advanced Metallurgy, University of Science and Technology of Beijing, 30 College Road, Beijing 100083, China. Fax: 86-10-6233 2651; Tel: 86-10-6233 2651; E-mail: [lijianling@ustb.edu.cn](mailto:lijianling@ustb.edu.cn)

Financial support from the 100 Talents Program of the Chinese Academy of Sciences, National Natural Science Foundation of China (No.: 21173226, 21376247), and State Key Laboratory of Multiphase Complex Systems, Institute of Process Engineering, Chinese Academy of Sciences (MPCS-2012-A-11) is gratefully acknowledged.

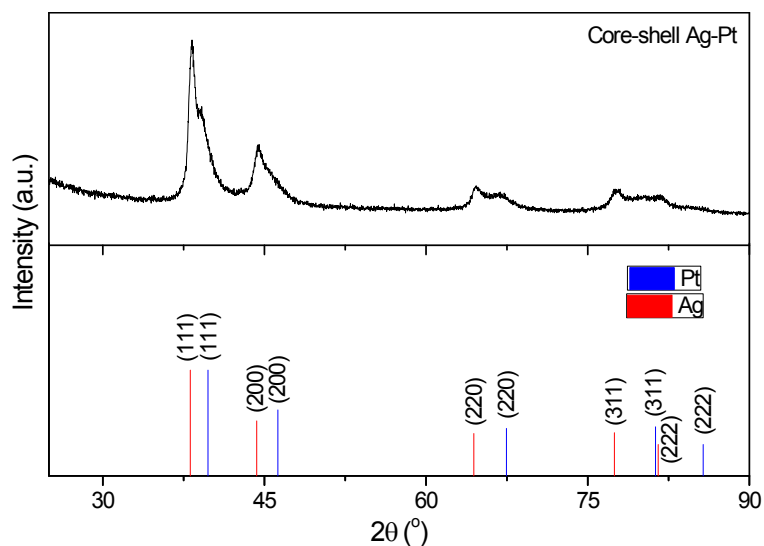

**Fig. S1** XRD pattern of the core-shell Ag-Pt nanoparticles synthesized in an one-pot approach. The references are JCPDS 893722 for Ag and JCPDS 882343 for Pt, respectively.

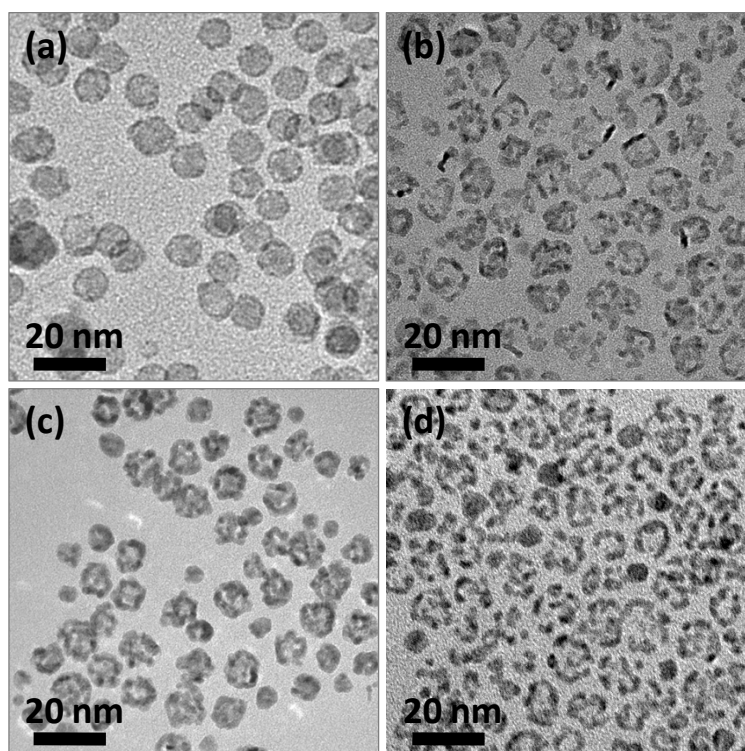

**Fig. S2** TEM images of Ru (a), Rh (b), Os (c), and Ir (d) nanoparticles with hollow interiors prepared by reacting core-shell Ag-Ru, Ag-Rh, Ag-Os, and Ag-Ir nanoparticles with saturated  $\text{Na}_2\text{S}$  aqueous solution.

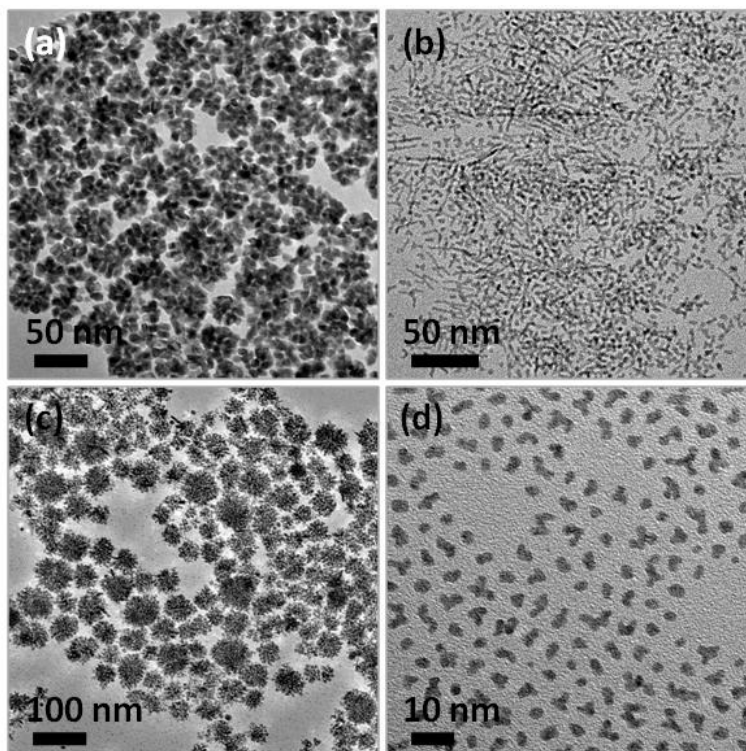

**Fig. S3** TEM images of dendritic Pt (a), wire-like Ru (b), dendritic Rh (c), and worm-like Ir (d) nanoparticles synthesized by solely reducing the corresponding metal precursors in oleylamine.

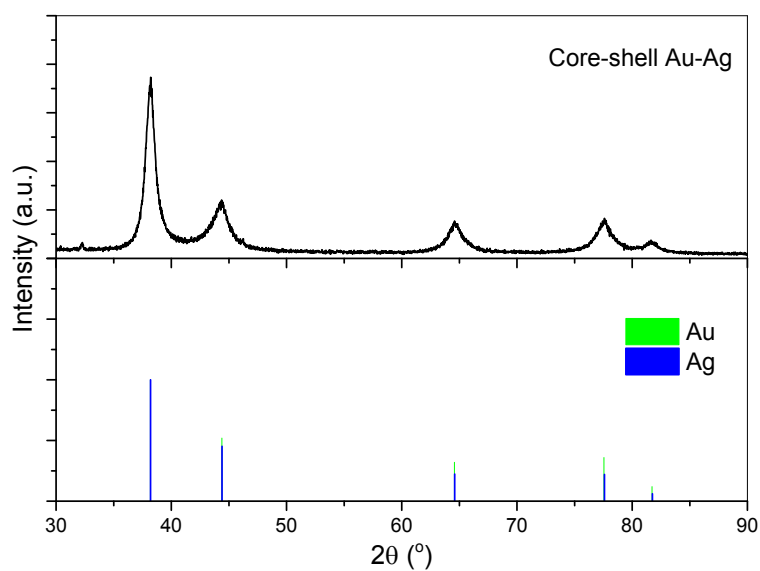

**Fig. S4** XRD pattern of the core-shell Au-Ag nanoparticles synthesized in an one-pot approach. The references are JCPDS 893697 for Au and JCPDS 893722 for Ag, respectively.

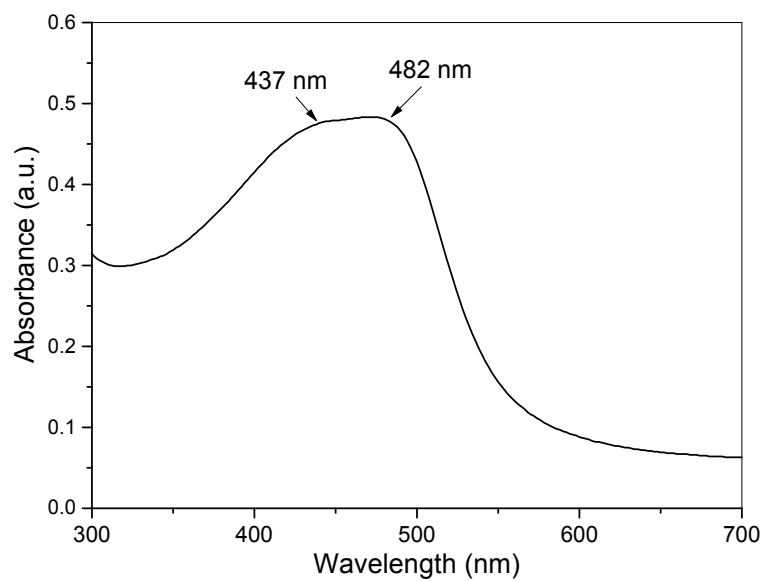

**Fig. S5** UV-visible spectrum of core-shell Au-Ag nanoparticles synthesized in oleylamine at elevated temperature by an one-pot approach.

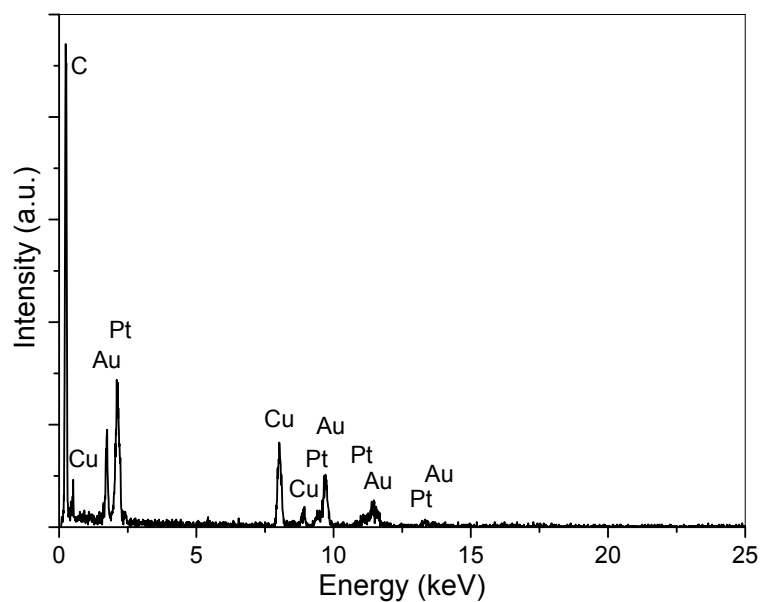

**Fig. S6** EDX analysis of the tri-metallic Au-Ag-Pt nanoparticles after treatment with saturated  $\text{Na}_2\text{S}$  solution.

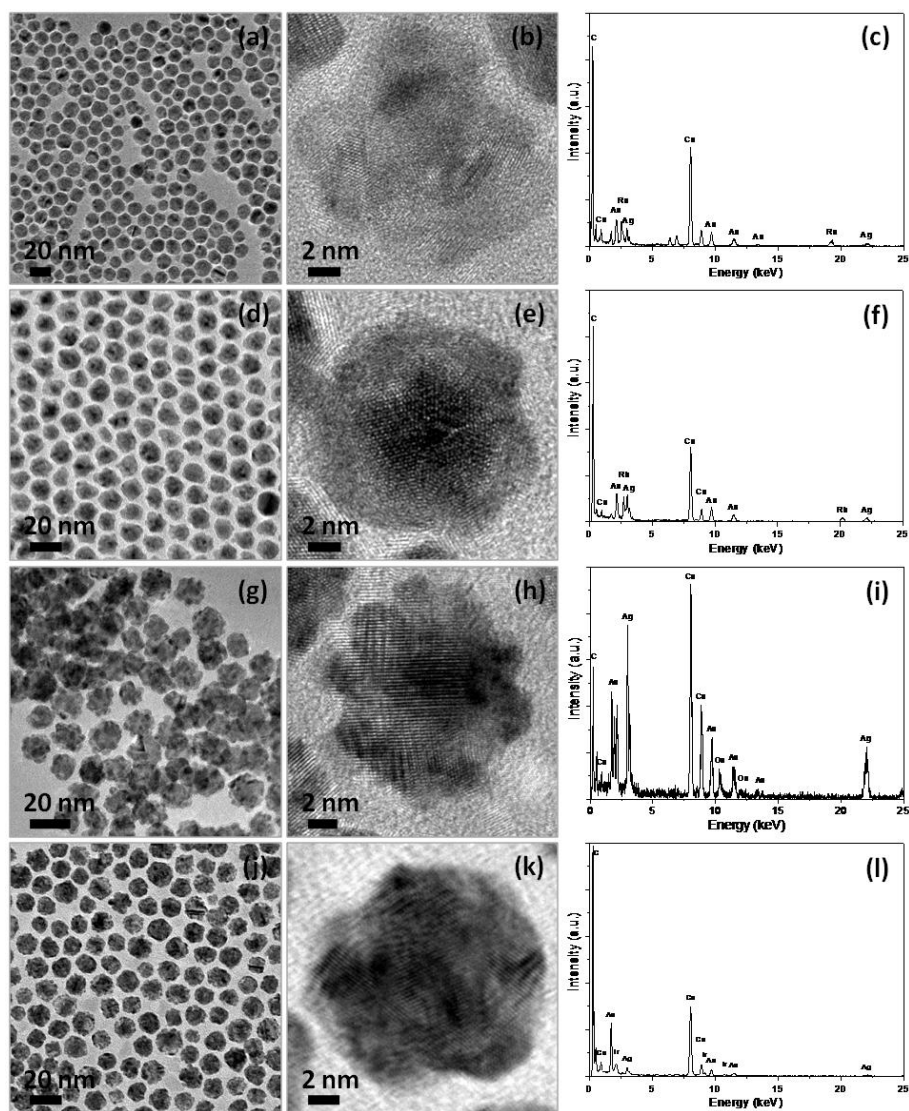

**Fig. S7** TEM images (a,d,g,j), HRTEM images (b,e,h,k), and EDX analyses (c,f,i,l) of core-shell-shell Au-Ag-Ru (a,b,c), Au-Ag-Rh (d,e,f), Au-Ag-Os (g,h,i), and Au-Ag-Ir (j,k,l) nanoparticles synthesized in oleylamine at elevated temperature by an one-pot approach.
